# Supplementary material
Source: publisher site journal article supplement (https://spandidos-publications.com/4026/downloadSupplementary)

Figure S1. Measurement of CDH2 expression after CDH2 over-expression and knockdown. Reverse transcription-PCR was used to measure the expression of CDH2 in LNCaP and LNCaP EnzaR cells (A) after transfection with pCMV-CDH2 and (B) after transfection with siRNA-CDH2. CDH2, N-cadherin; siRNA, small interfering RNA.

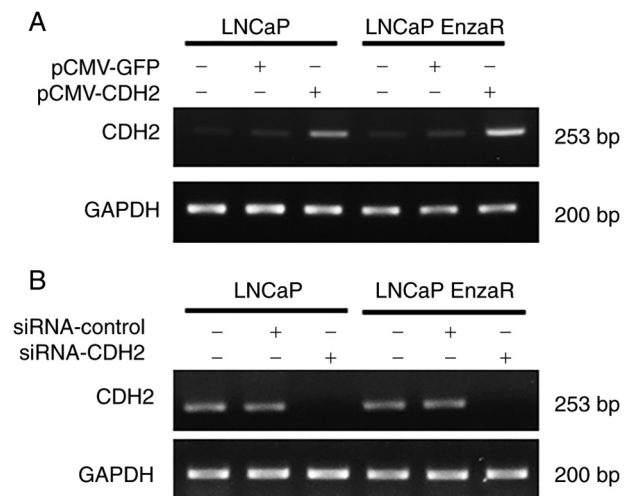

Supplement: Supplementary file 1 [file downloadSupplementary]
